# Supplementary material for: Organic peroxy radical chemistry in oxidation flow reactors and environmental chambers and their atmospheric relevance
Source: Copernicus journal article supplement (doi:10.5194/acp-19-813-2019), 2019-01-22
Supplement: Supplementary file 1 [file acp-19-813-2019-supplement.zip]

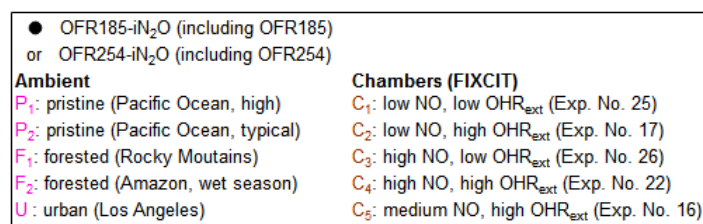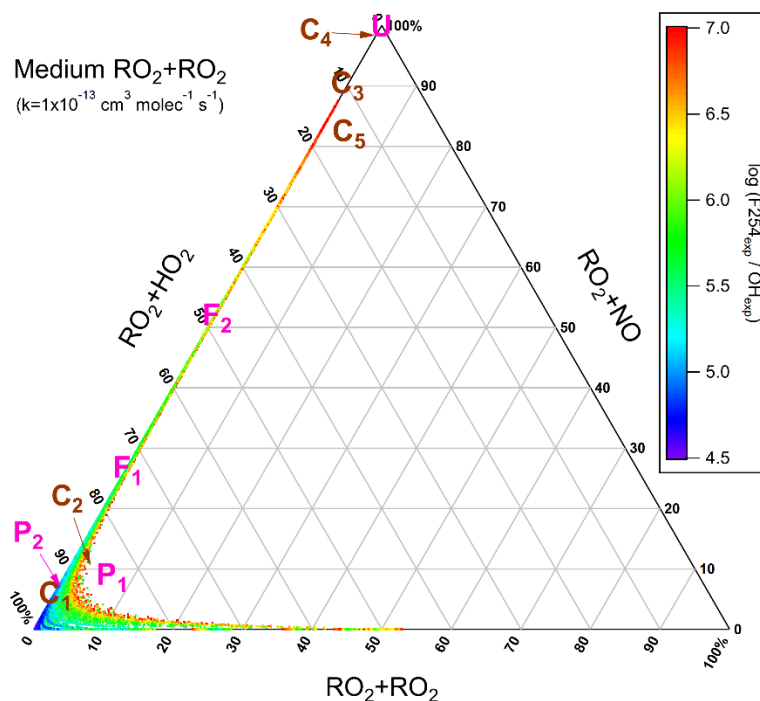

(a) OFR254-7, medium RO<sub>2</sub>+RO<sub>2</sub>

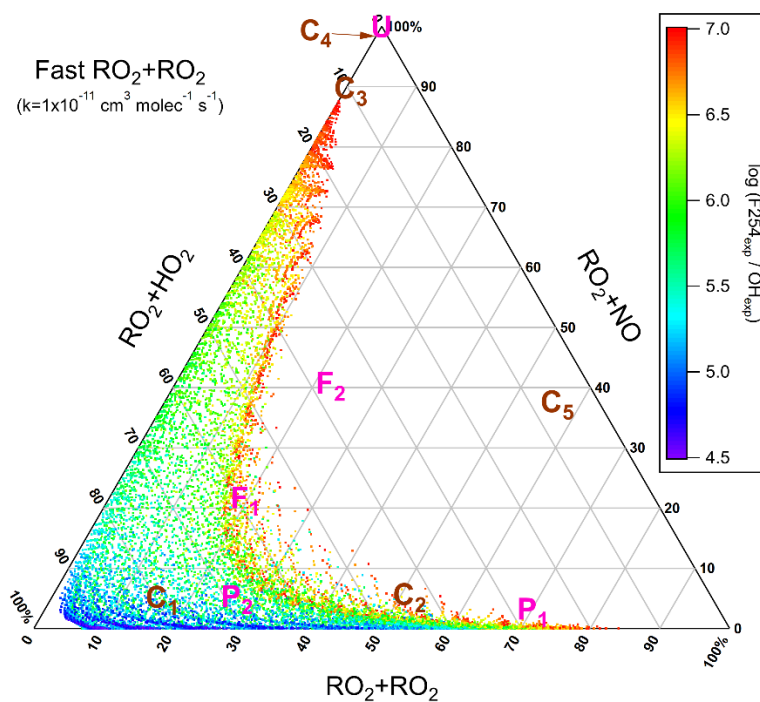

(b) OFR254-7, fast RO<sub>2</sub>+RO<sub>2</sub>

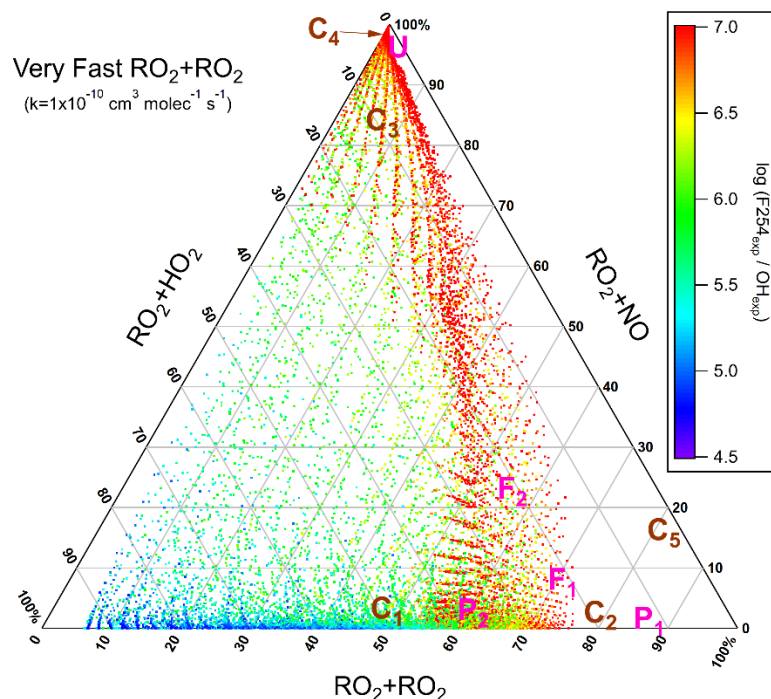

**(c) OFR185, very fast  $\text{RO}_2 + \text{RO}_2$**

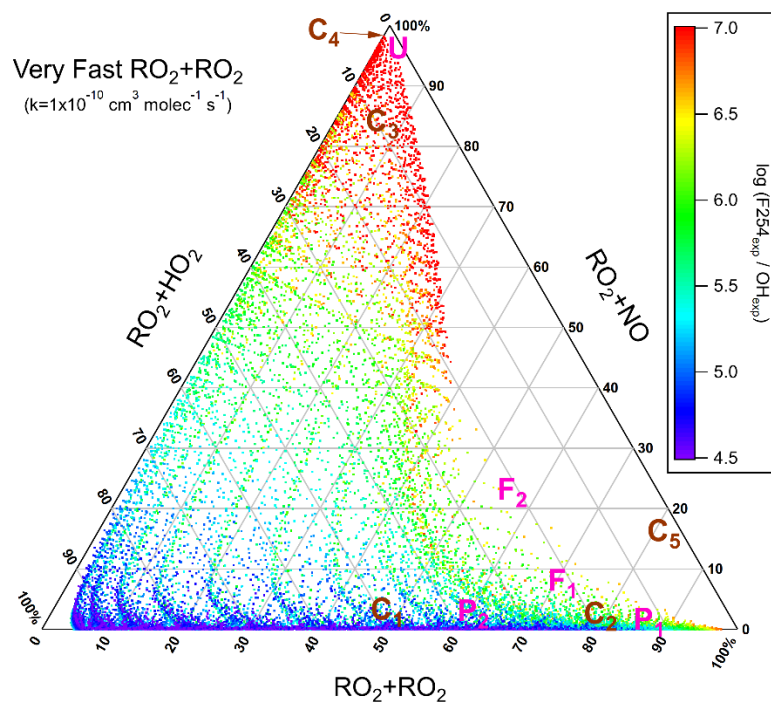

**(d) OFR254-70, very fast  $\text{RO}_2 + \text{RO}_2$**

**Figure S1.** Same format as Fig. 1, but for (a) medium and (b) fast  $\text{RO}_2 + \text{RO}_2$  in OFR254-7 (including OFR254-7-iN<sub>2</sub>O) and very fast  $\text{RO}_2 + \text{RO}_2$  in (c) OFR185 (including OFR185-iN<sub>2</sub>O) and (d) OFR254-70 (including OFR254-70-iN<sub>2</sub>O).

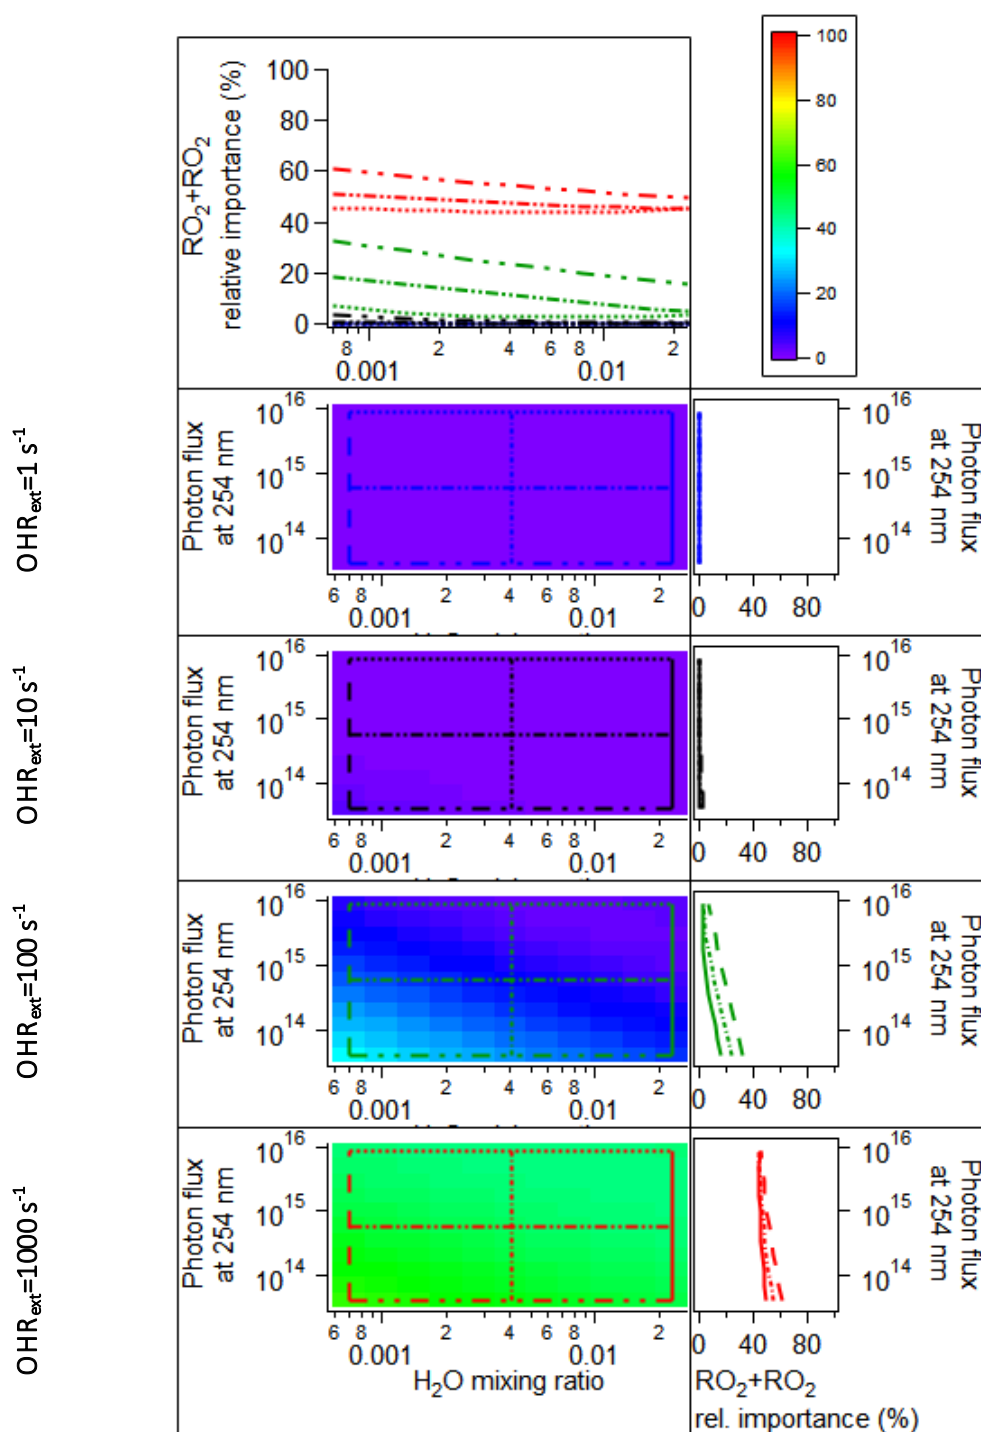

27

28 **Figure S2.** Dependence of the relative importance of  $\text{RO}_2+\text{RO}_2$  in the fate of  $\text{RO}_2$  (with the medium  
 29 self/cross reaction rate constant and without  $\text{RO}_2+\text{OH}$  and  $\text{RO}_2$  isomerization considered) on  $\text{H}_2\text{O}$  and UV,  
 30 for  $\text{OHR}_{\text{ext}}$  of 1, 10, 100, and 1000  $\text{s}^{-1}$  (first, second, third, and fourth row of image plots in each multi-  
 31 panel composite, respectively) in OFR254-70 ( $\text{N}_2\text{O}=0$ ). The panels above and on the right of image plots  
 32 are the line plots of the  $\text{RO}_2+\text{RO}_2$  relative importance in several typical cases. These cases are denoted in  
 33 the image plots by horizontal or vertical lines of the same color and pattern as in the line plots. The cut  
 34 lines are in blue, black, dark green, and red in the plots for the cases at different external OH reactivity  
 35 (excluding  $\text{NO}_y$ ) levels.

36

$\text{OHR}_{\text{ext}}=1000 \text{ s}^{-1}$      $\text{OHR}_{\text{ext}}=100 \text{ s}^{-1}$      $\text{OHR}_{\text{ext}}=10 \text{ s}^{-1}$      $\text{OHR}_{\text{ext}}=1 \text{ s}^{-1}$

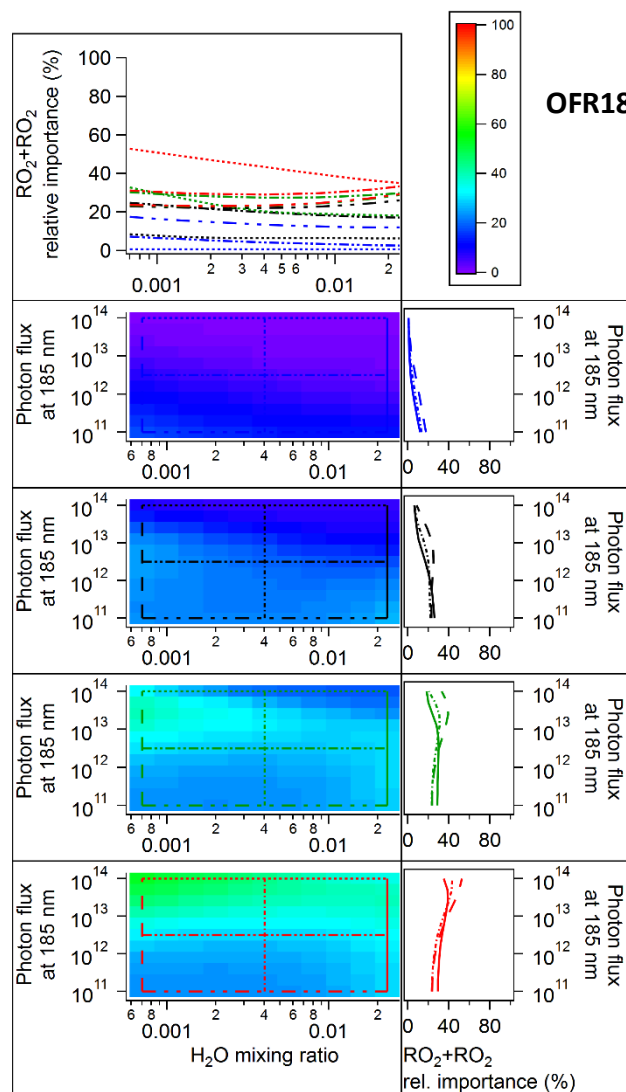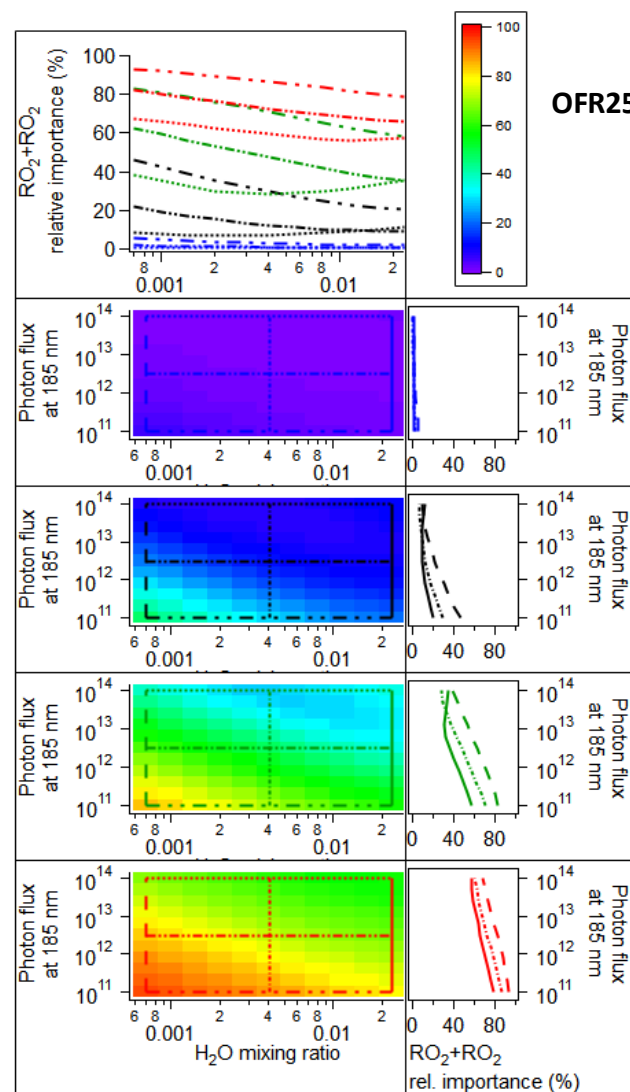

37 **Figure S3.** Same format as Fig. S2, but for RO<sub>2</sub> with the fast self/cross reaction rate constants in OFR185 and OFR254-70 (N<sub>2</sub>O=0).  
38

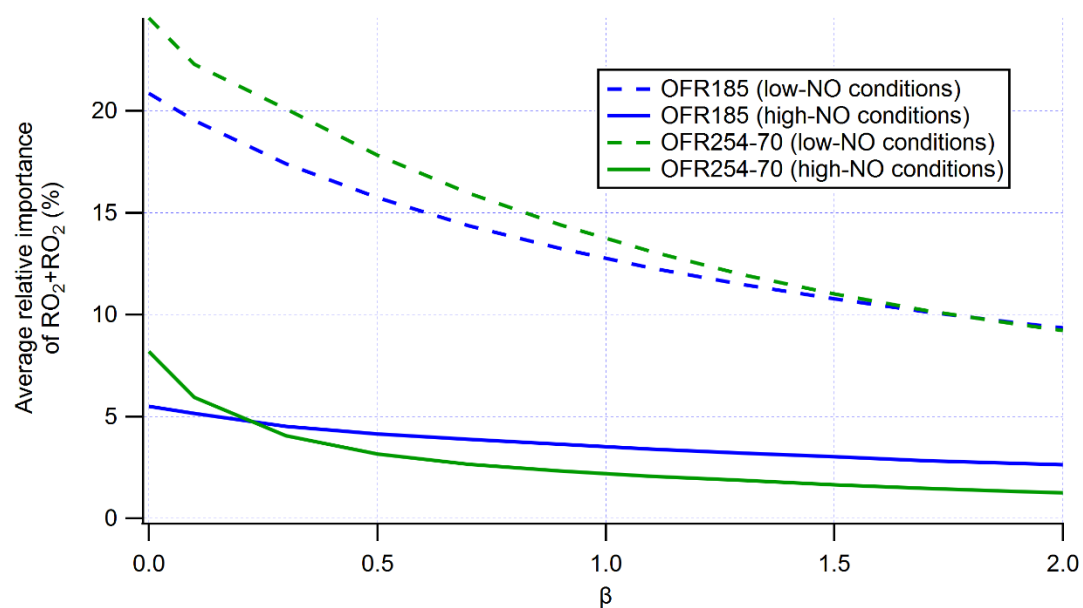

**Figure S4.** Average relative importance of  $\text{RO}_2+\text{RO}_2$  in  $\text{RO}_2$  fate (with fast self-/cross-reaction rate constant and without  $\text{RO}_2+\text{OH}$  and  $\text{RO}_2$  isomerization considered) for OFR185 (including OFR185- $\text{iN}_2\text{O}$ ) and OFR254-70 (including OFR254-70- $\text{iN}_2\text{O}$ ) high-/low-NO conditions as a function of  $\text{HO}_x$  recycling ratio ( $\beta$ , see Section 2.3 for its definition) in a sensitivity study with a fixed  $\beta$  for each of the sensitivity cases.

45

46

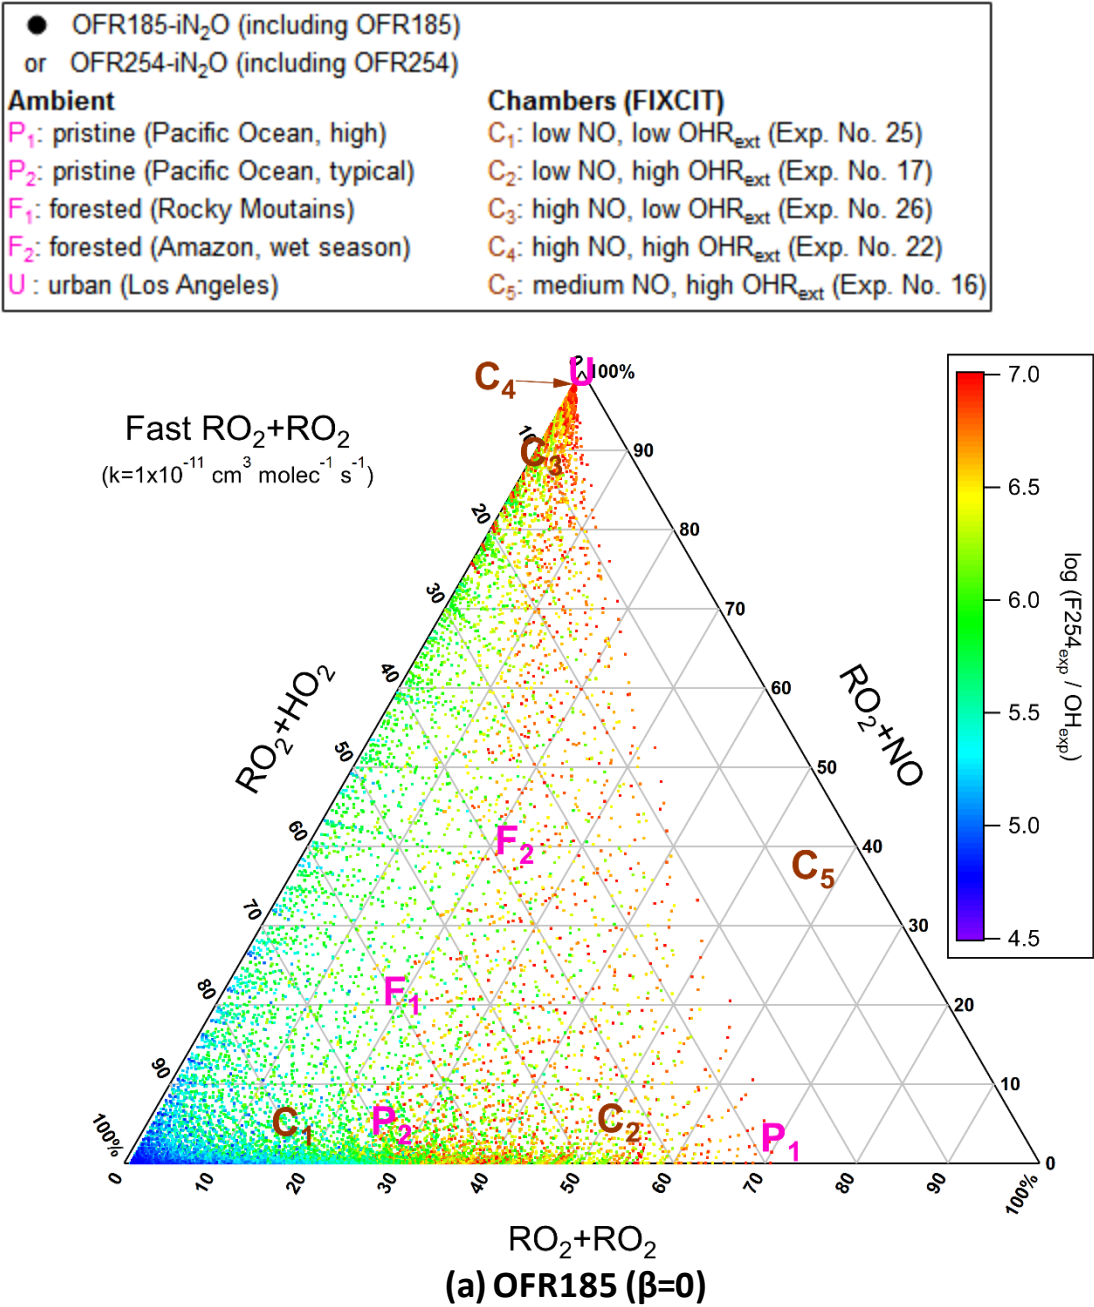

47

48

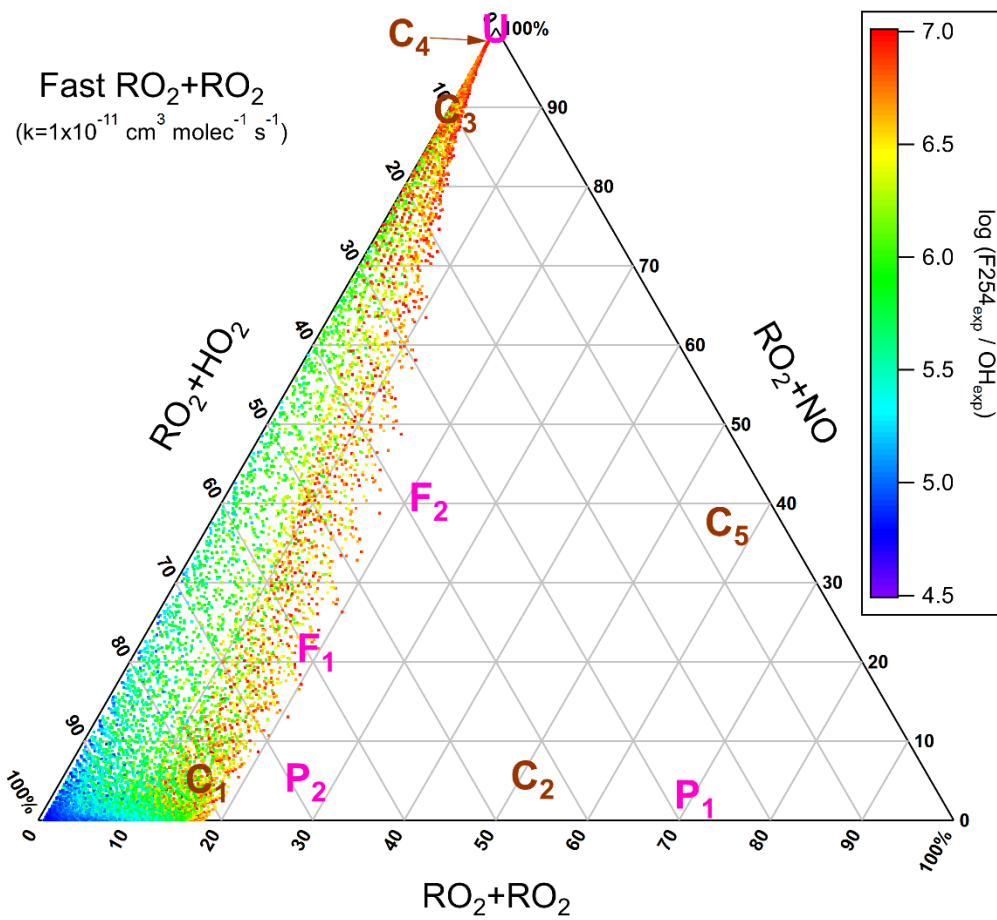

(b) OFR185 ( $\beta=2$ )

49  
50



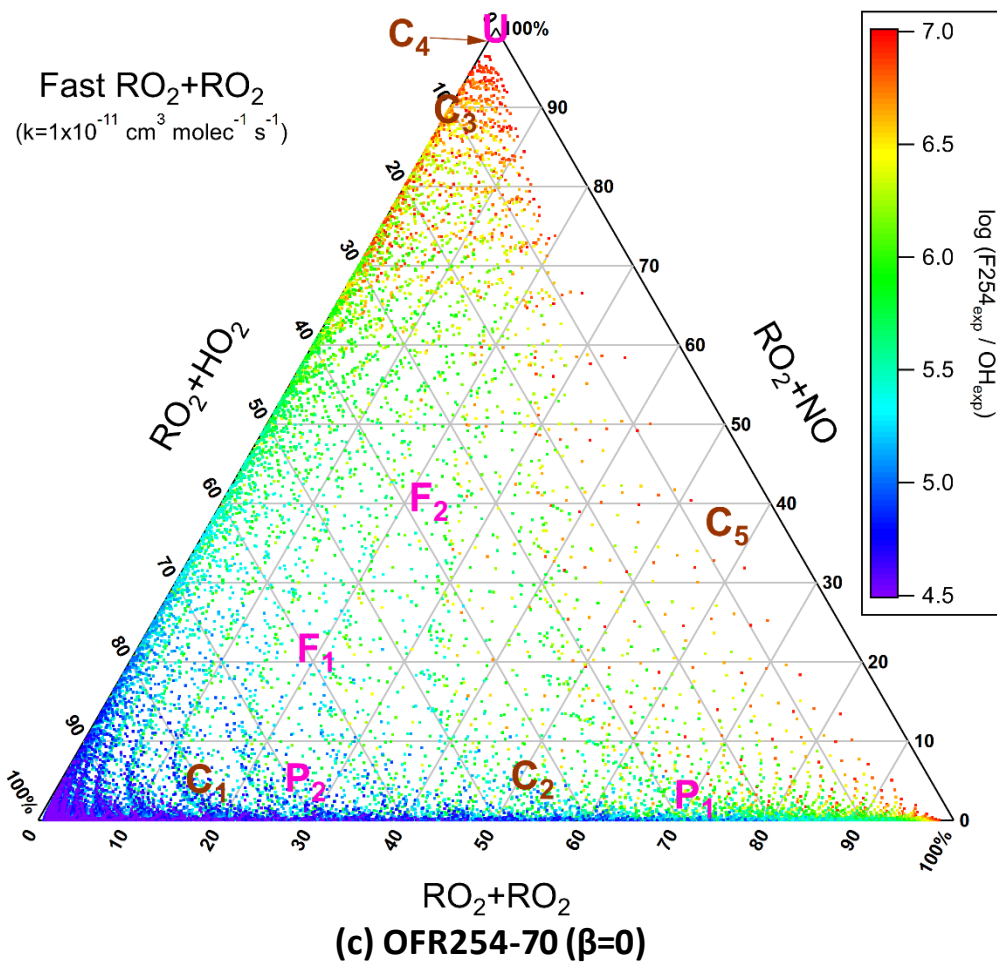

51  
52

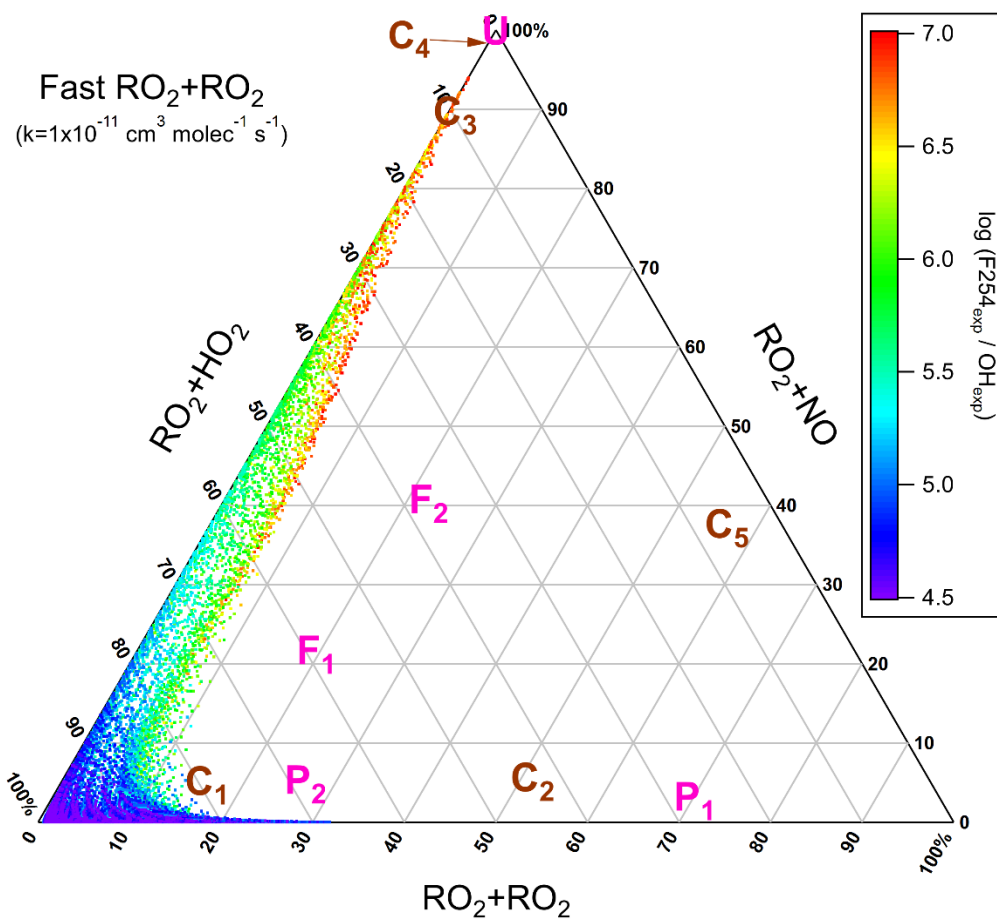

(d) OFR254-70 ( $\beta=2$ )

Figure S5. Same format as Fig. 1, but for sensitivity cases with fixed HO<sub>x</sub> recycling ratio ( $\beta$ ).

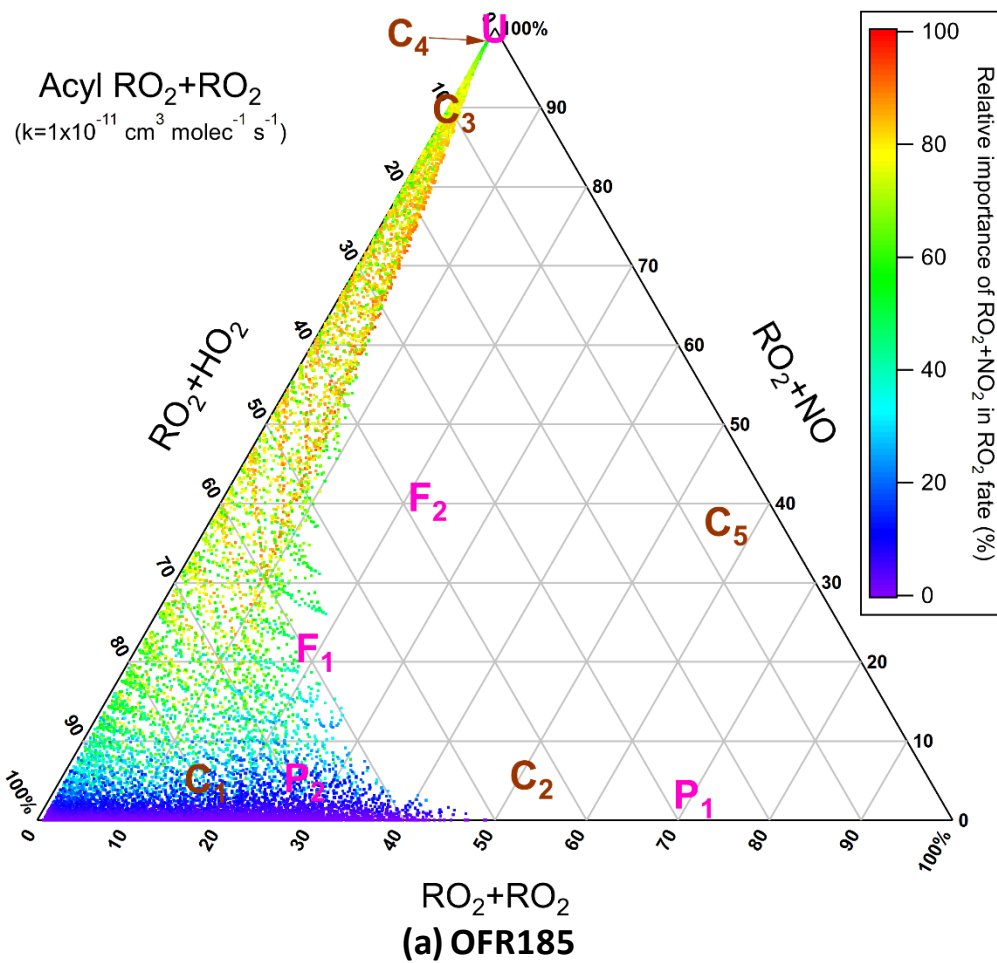

57  
58

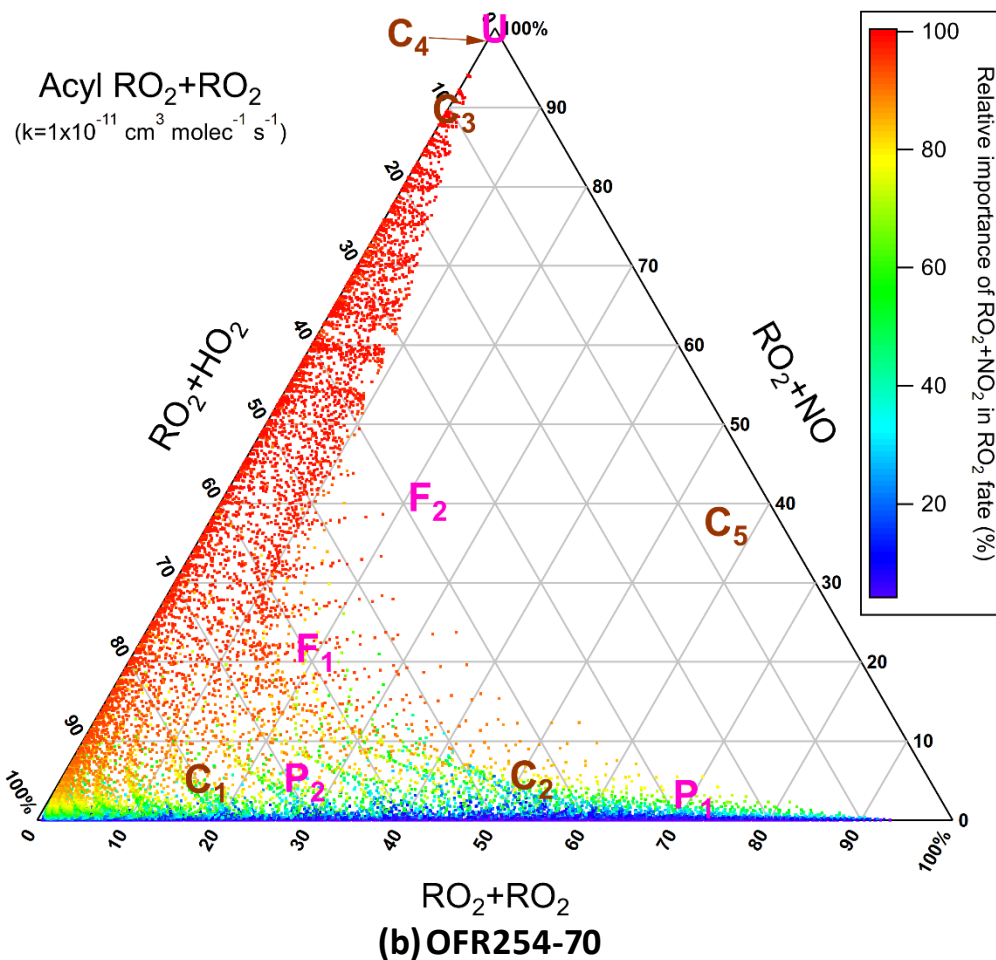

**Figure S6.** Same format as Fig. 1, but for acyl RO<sub>2</sub> (without RO<sub>2</sub>+OH and RO<sub>2</sub> isomerization considered) in OFR185 (including OFR185-iN<sub>2</sub>O), OFR254-70 (including OFR254-70-iN<sub>2</sub>O). Note that the triangle plots in this figure only show the relative contributions of RO<sub>2</sub>+HO<sub>2</sub>, RO<sub>2</sub>+NO and RO<sub>2</sub>+RO<sub>2</sub> to their sum, not to the total loss of acyl RO<sub>2</sub>.

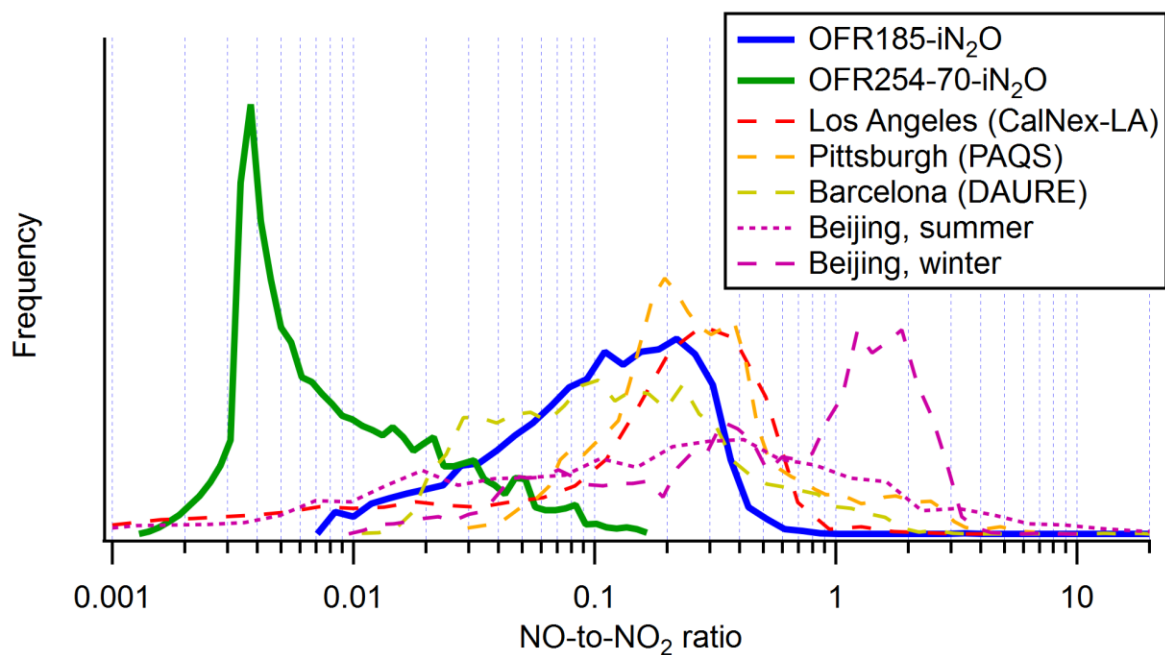

66

67 **Figure S7.** Frequency occurrence distributions of NO-to-NO<sub>2</sub> ratios for OFR185-iN<sub>2</sub>O and OFR254-70-  
 68 iN<sub>2</sub>O model cases and measured at the Los Angeles, Pittsburgh and Barcelona ground sites during the  
 69 CalNex-LA 2010, PAQS 2002 and DAURE 2009 campaigns, respectively (Zhang et al., 2005; Reche et al.,  
 70 2011; Ryerson et al., 2013) and at a ground site in Beijing in both summer and winter (Hu et al., 2016).  
 71 OFR cases under bad conditions are filtered out. The total areas of all distributions are identical.

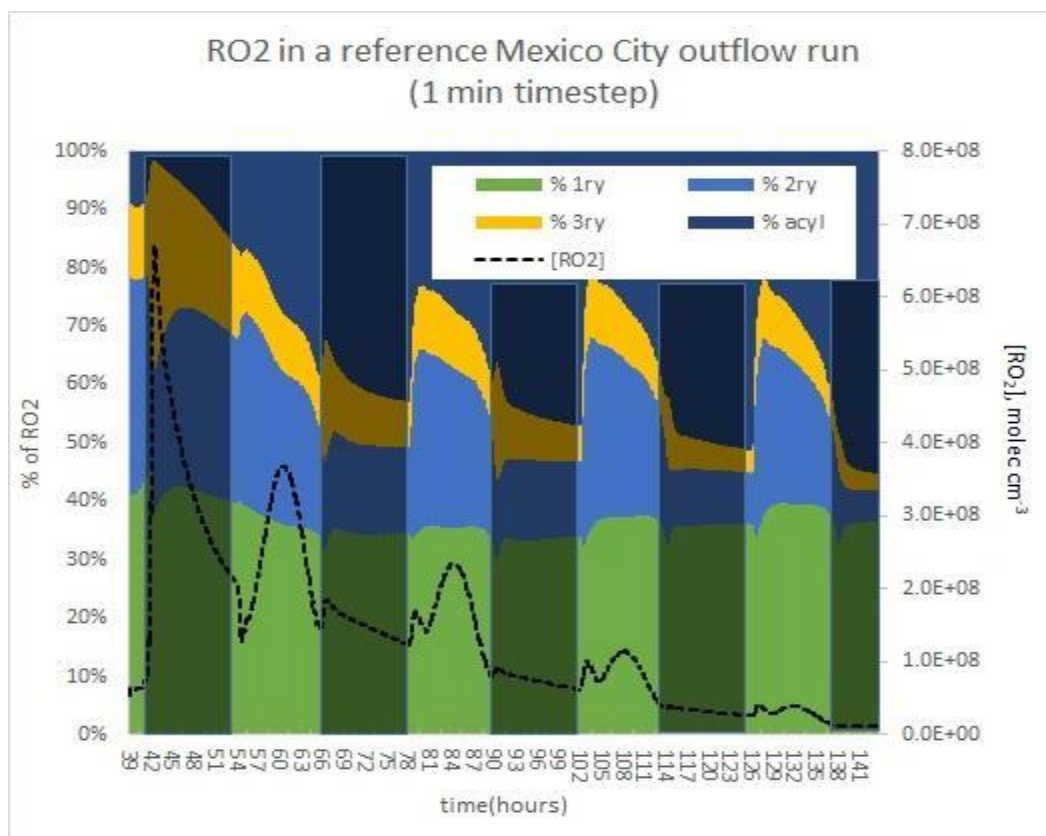

72

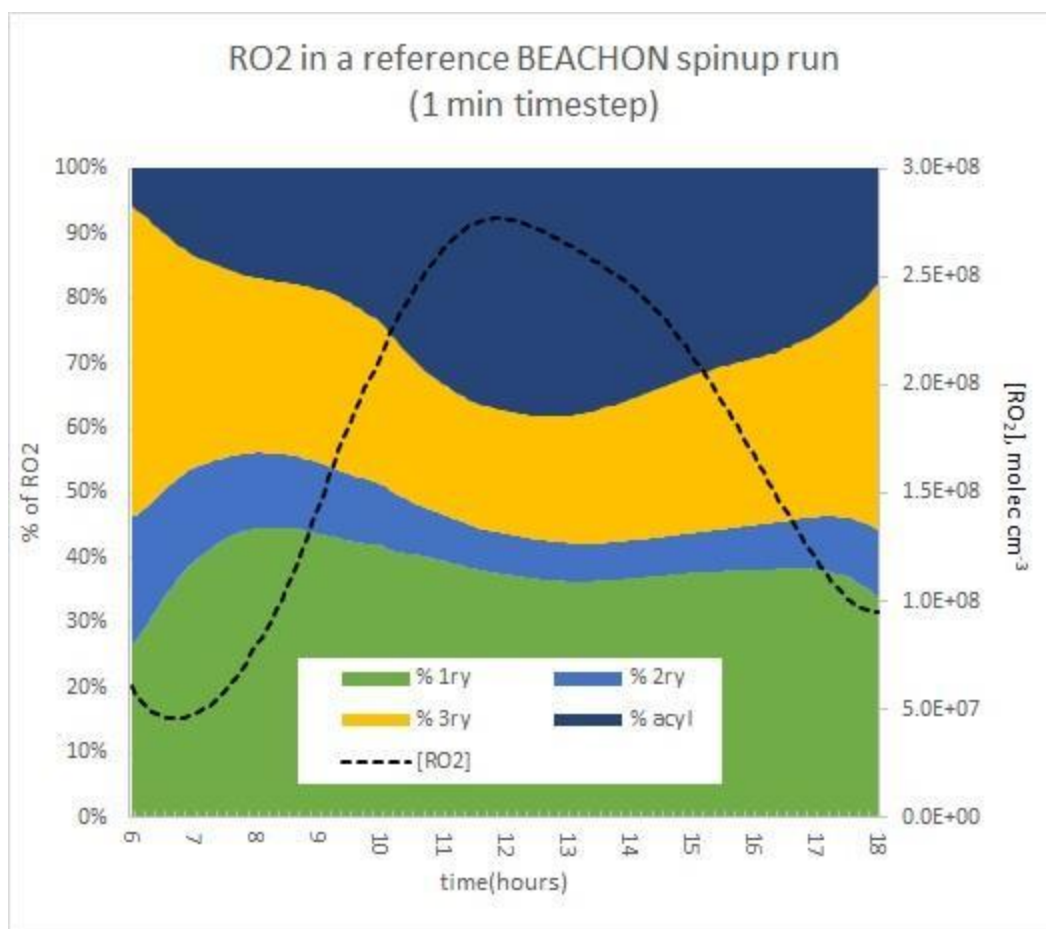

73

74 **Figure S8.** (a) RO<sub>2</sub> concentration and composition [primary (1ry), secondary (2ry), tertiary (3ry) and acyl  
75 RO<sub>2</sub>] as a function of aging time for the simulation of a parcel of air advected from Mexico City during  
76 the MILAGRO 2006 campaign using the fully explicit GECKO-A model (Lee-Taylor et al., 2015). (b) The  
77 same for a GECKO-A simulation of air in a Rocky Mountain pine forest for the average diurnal cycle  
78 during the BEACHON-RoMBAS 2011 campaign (Palm et al., 2016; Hunter et al., 2017). Nighttime is  
79 denoted by shaded area.

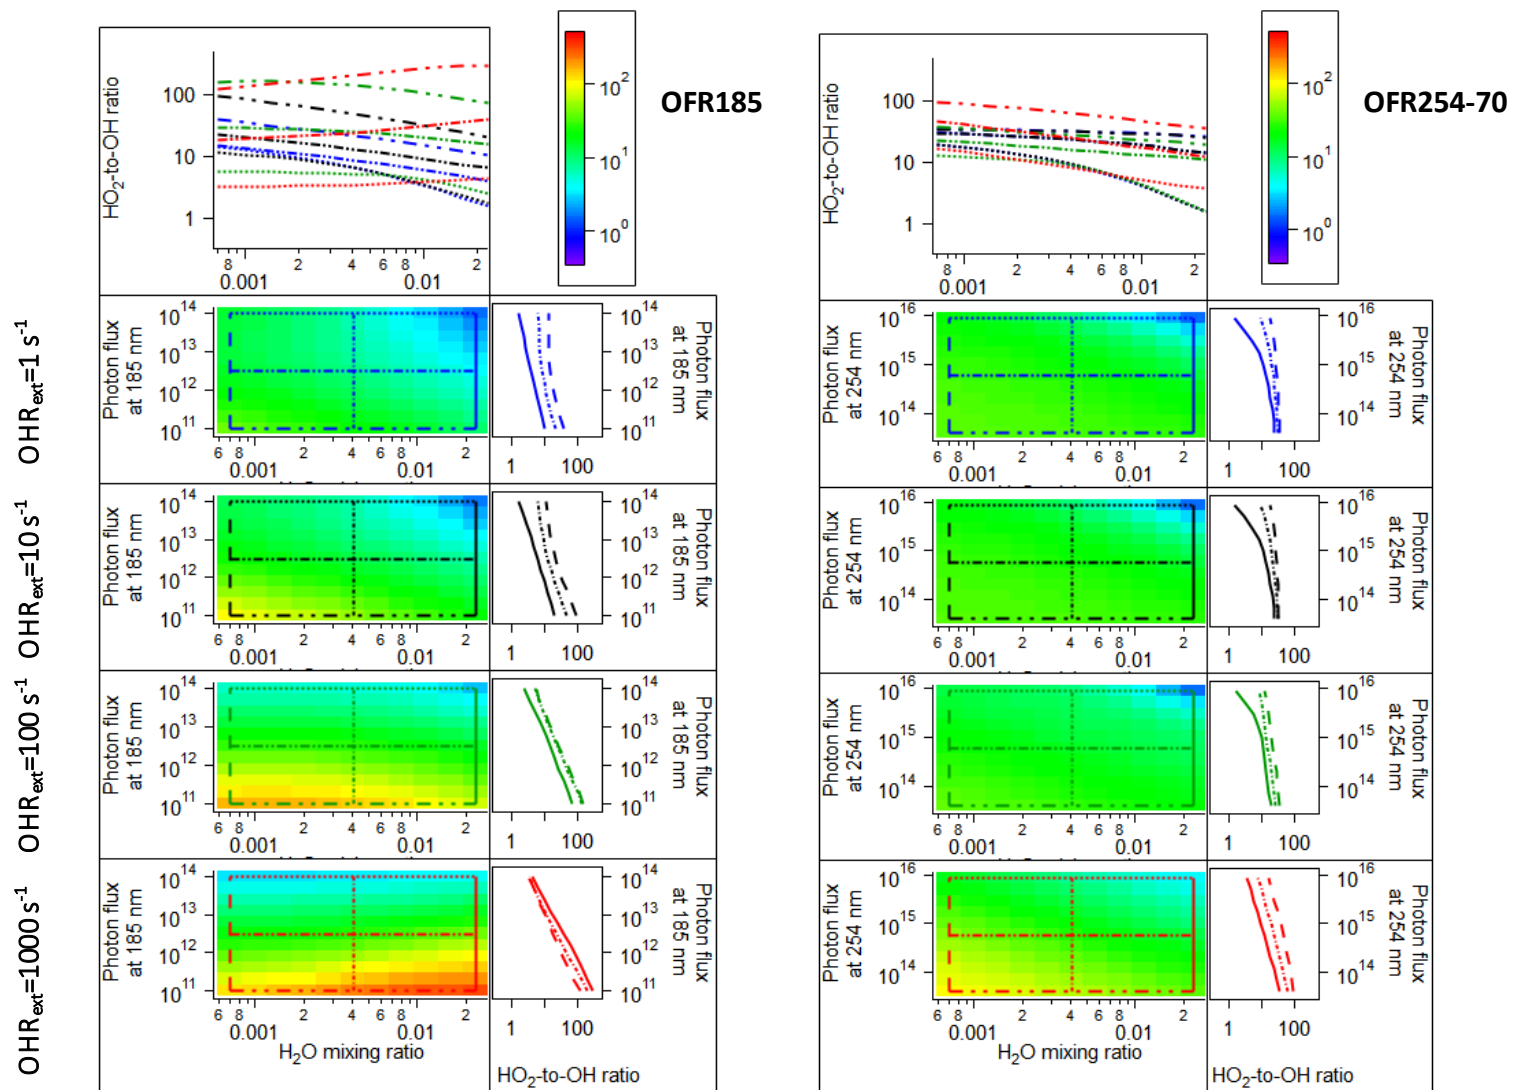

**Figure S9.** Same format as Fig. S3, but for the  $\text{HO}_2$ -to-OH ratio in OFR185 and OFR254-70 ( $\text{N}_2\text{O}=0$ ) cases with medium  $\text{RO}_2$  self/cross reaction rate constant.



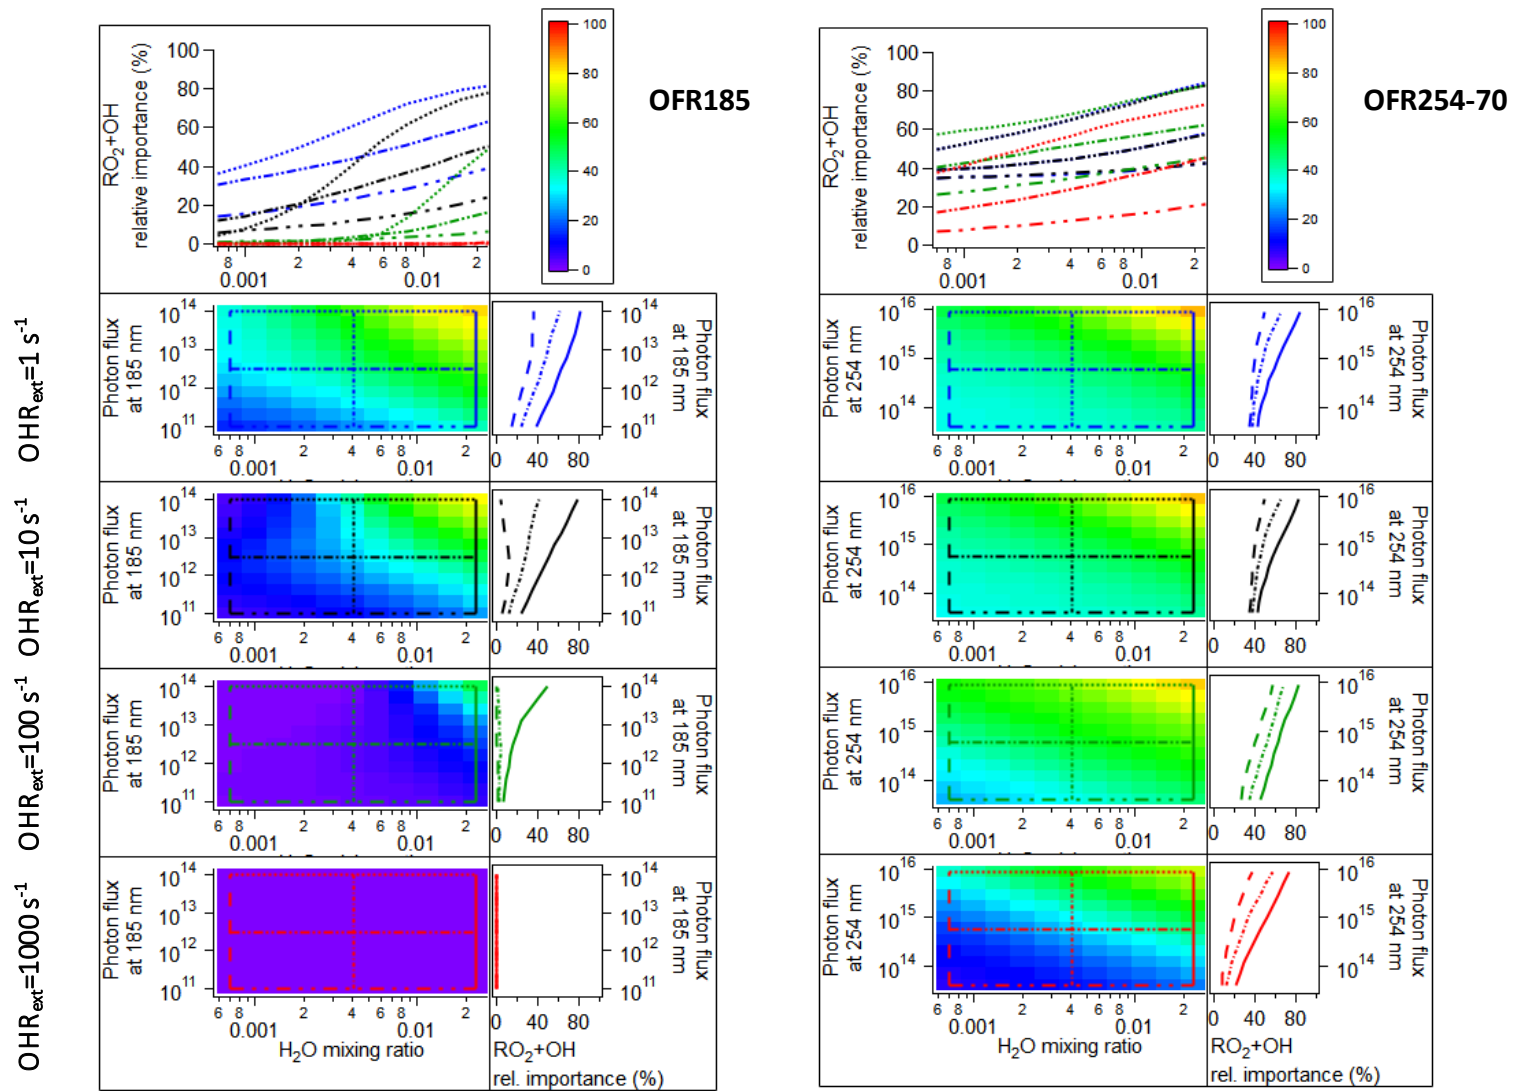

**Figure S10.** Same format as Fig. S3, but for the relative importance of RO<sub>2</sub>+OH in the fate of RO<sub>2</sub> (with medium RO<sub>2</sub> self/cross reaction rate constant) in OFR185 and OFR254-70 (N<sub>2</sub>O=0).

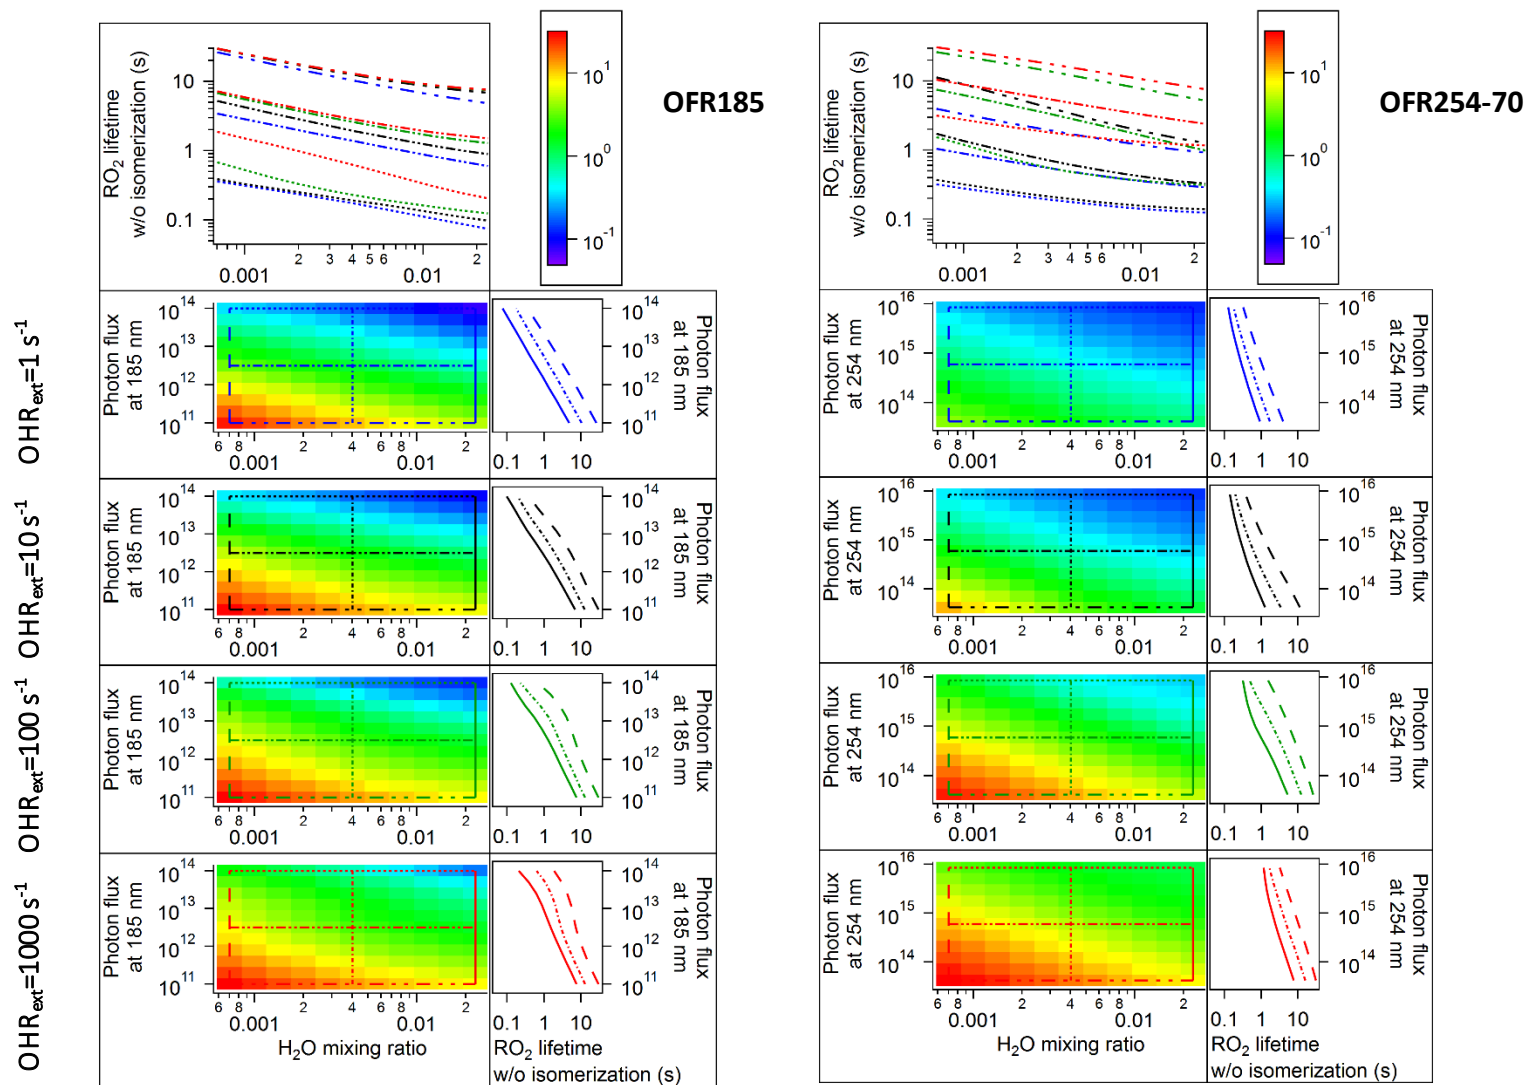

**Figure S11.** Same format as Fig. S3, but for the RO<sub>2</sub> lifetime [with medium RO<sub>2</sub> self/cross reaction rate constant and excluding the contribution of RO<sub>2</sub> isomerization to its lifetime (but RO<sub>2</sub> isomerization included in the model)] in OFR185 and OFR254-70 (N<sub>2</sub>O=0).

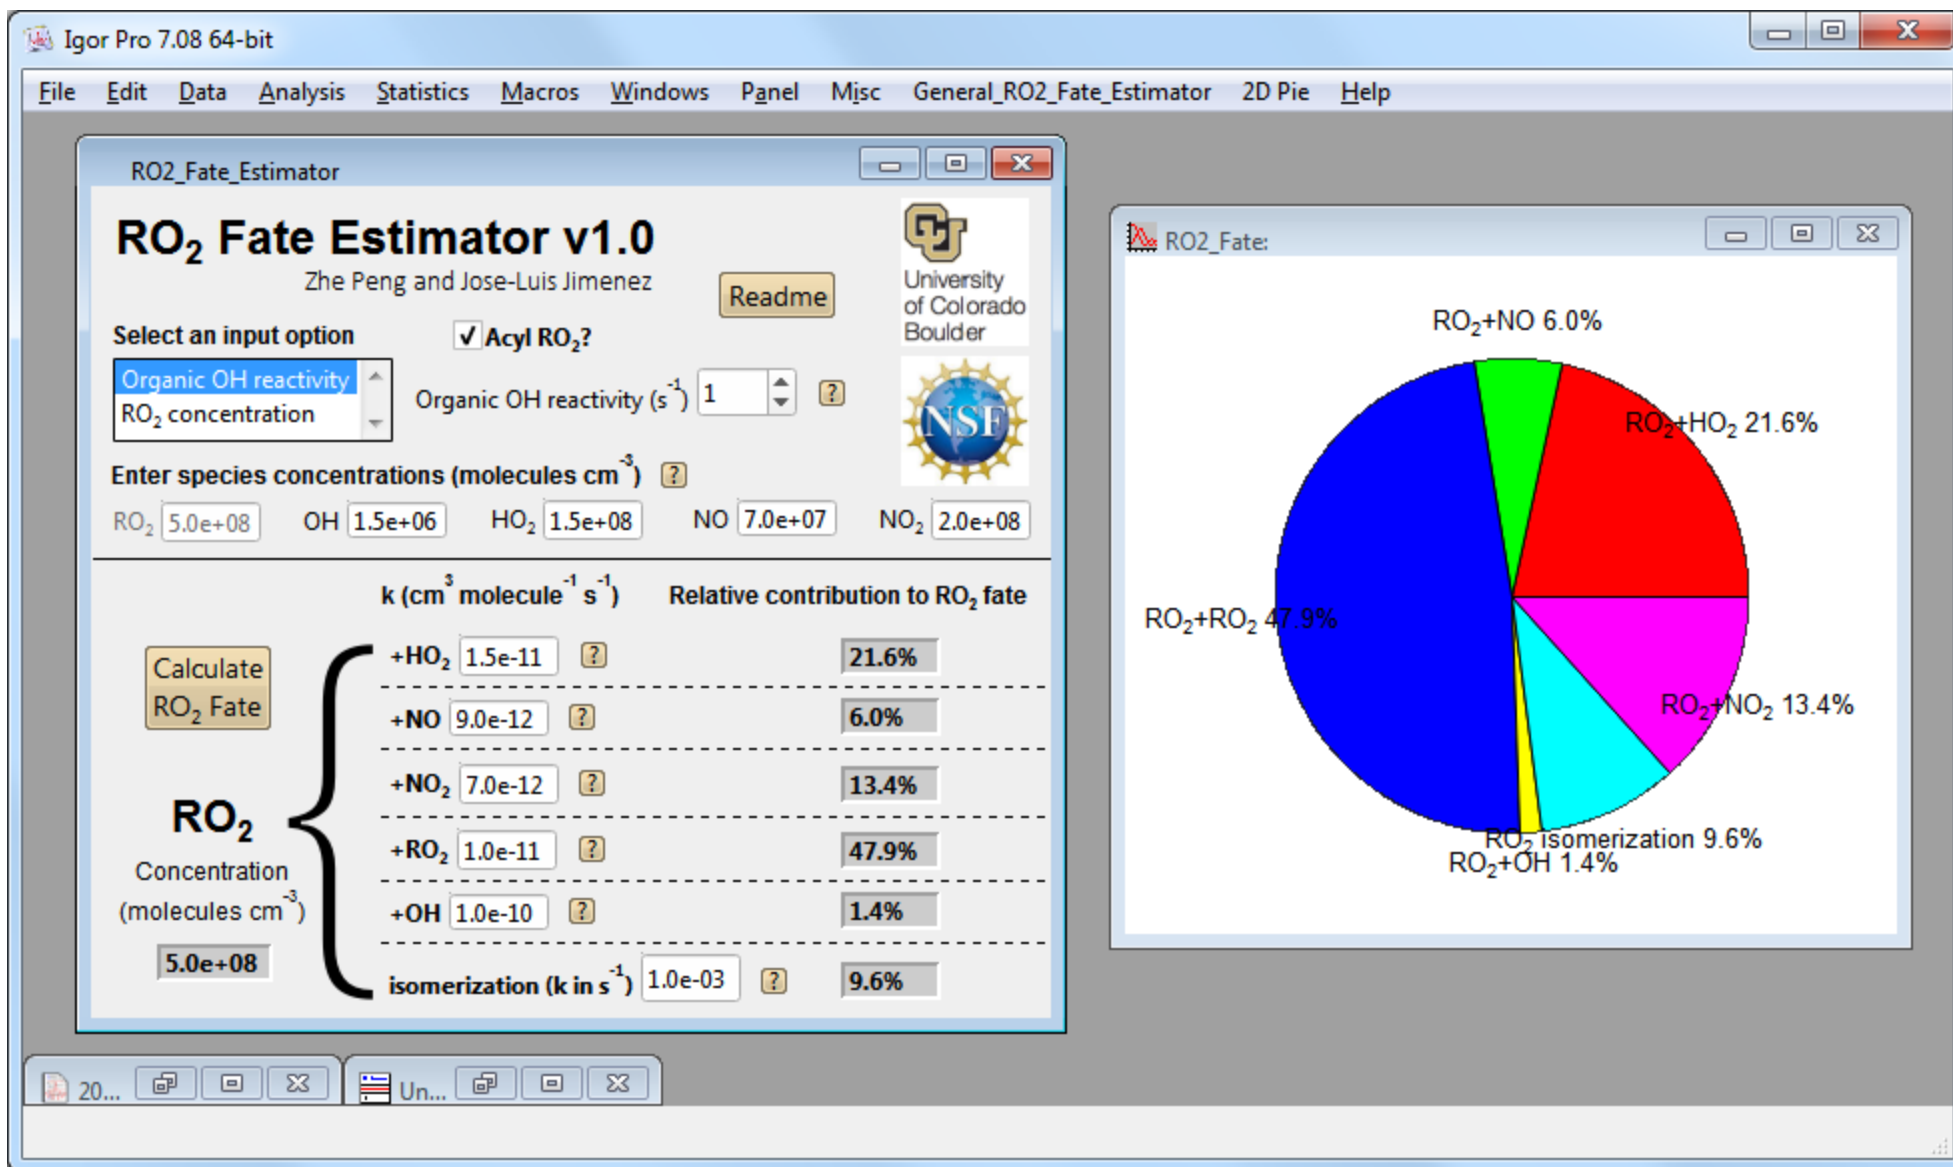

**Figure S7.** Screenshot of the layout of the General RO<sub>2</sub> Fate Estimator. The Estimator is running in Igor Pro v7 (WaveMetrics, Inc., Lake Oswego, Oregon, USA), which is downloadable at <https://www.wavemetrics.com/software/igor-pro-708-installer>.

**Table S1.** Definition of OFR condition types in this study (good/risky/bad high/low-NO). Good/risky/bad conditions are classified only in terms of non-tropospheric organic photolysis and this classification does *not* indicate whether RO<sub>2</sub> chemistry is atmospherically relevant.

| Condition | Good                                                                                                                                                             | Risky                                                                                                                                                                                           | Bad                                                                                                                                                             |
|-----------|------------------------------------------------------------------------------------------------------------------------------------------------------------------|-------------------------------------------------------------------------------------------------------------------------------------------------------------------------------------------------|-----------------------------------------------------------------------------------------------------------------------------------------------------------------|
| Criterion | F185 <sub>exp</sub> /OH <sub>exp</sub> <3x10 <sup>3</sup> cm s <sup>-1</sup> and<br>F254 <sub>exp</sub> /OH <sub>exp</sub> <4x10 <sup>5</sup> cm s <sup>-1</sup> | F185 <sub>exp</sub> /OH <sub>exp</sub> <1x10 <sup>5</sup> cm s <sup>-1</sup> and<br>F254 <sub>exp</sub> /OH <sub>exp</sub> <1x10 <sup>7</sup> cm s <sup>-1</sup><br>(excluding good conditions) | F185 <sub>exp</sub> /OH <sub>exp</sub> ≥1x10 <sup>5</sup> cm s <sup>-1</sup> or<br>F254 <sub>exp</sub> /OH <sub>exp</sub> ≥1x10 <sup>7</sup> cm s <sup>-1</sup> |
|           |                                                                                                                                                                  |                                                                                                                                                                                                 |                                                                                                                                                                 |
| Condition | High-NO                                                                                                                                                          | Low-NO                                                                                                                                                                                          |                                                                                                                                                                 |
| Criterion | $\frac{r(\text{RO}_2+\text{NO})}{r(\text{RO}_2+\text{HO}_2)} > 1$                                                                                                | $\frac{r(\text{RO}_2+\text{NO})}{r(\text{RO}_2+\text{HO}_2)} \leq 1$                                                                                                                            |                                                                                                                                                                 |

References

Hu, W., Hu, M., Hu, W., Jimenez, J. L., Yuan, B., Chen, W., Wang, M., Wu, Y., Chen, C., Wang, Z., Peng, J., Zeng, L. and Shao, M.: Chemical composition, sources, and aging process of submicron aerosols in Beijing: Contrast between summer and winter, *J. Geophys. Res. Atmos.*, 121(4), 1955–1977, doi:10.1002/2015JD024020, 2016.

Hunter, J. F., Day, D. A., Palm, B. B., Yatavelli, R. L. N., Chan, A. W. H., Kaser, L., Cappellin, L., Hayes, P. L., Cross, E. S., Carrasquillo, A. J., Campuzano-Jost, P., Stark, H., Zhao, Y., Hohaus, T., Smith, J. N., Hansel, A., Karl, T., Goldstein, A. H., Guenther, A., Worsnop, D. R., Thornton, J. A., Heald, C. L., Jimenez, J. L. and Kroll, J. H.: Comprehensive characterization of atmospheric organic carbon at a forested site, *Nat. Geosci.*, 10(10), 748–753, doi:10.1038/NGEO3018, 2017.

Lee-Taylor, J., Hodzic, A., Madronich, S., Aumont, B., Camredon, M. and Valorso, R.: Multiday production of condensing organic aerosol mass in urban and forest outflow, *Atmos. Chem. Phys.*, 15(2), 595–615, doi:10.5194/acpd-14-17999-2014, 2015.

Palm, B. B., Campuzano-Jost, P., Ortega, A. M., Day, D. A., Kaser, L., Jud, W., Karl, T., Hansel, A., Hunter, J. F., Cross, E. S., Kroll, J. H., Peng, Z., Brune, W. H. and Jimenez, J. L.: In situ secondary organic aerosol formation from ambient pine forest air using an oxidation flow reactor, *Atmos. Chem. Phys.*, 16(5), 2943–2970, doi:10.5194/acp-16-2943-2016, 2016.

Reche, C., Viana, M., Moreno, T., Querol, X., Alastuey, A., Pey, J., Pandolfi, M., Prévôt, A., Mohr, C., Richard, A., Artiñano, B., Gomez-Moreno, F. J. and Cots, N.: Peculiarities in atmospheric particle number and size-resolved speciation in an urban area in the western Mediterranean: Results from the DAURE campaign, *Atmos. Environ.*, 45(30), 5282–5293, doi:10.1016/j.atmosenv.2011.06.059, 2011.

Ryerson, T. B., Andrews, A. E., Angevine, W. M., Bates, T. S., Brock, C. A., Cairns, B., Cohen, R. C., Cooper, O. R., De Gouw, J. A., Fehsenfeld, F. C., Ferrare, R. A., Fischer, M. L., Flagan, R. C., Goldstein, A. H., Hair, J. W., Hardesty, R. M., Hostetler, C. A., Jimenez, J. L., Langford, A. O., McCauley, E., McKeen, S. A., Molina, L. T., Nenes, A., Oltmans, S. J., Parrish, D. D., Pederson, J. R., Pierce, R. B., Prather, K., Quinn, P. K., Seinfeld, J. H., Senff, C. J., Sorooshian, A., Stutz, J., Surratt, J. D., Trainer, M., Volkamer, R., Williams, E. J. and Wofsy, S. C.: The 2010 California Research at the Nexus of Air Quality and Climate Change (CalNex) field study, *J. Geophys. Res. Atmos.*, 118(11), 5830–5866, doi:10.1002/jgrd.50331, 2013.

Zhang, Q., Canagaratna, M. R., Jayne, J. T., Worsnop, D. R. and Jimenez, J.-L.: Time- and size-resolved chemical composition of submicron particles in Pittsburgh: Implications for aerosol sources and processes, *J. Geophys. Res.*, 110(D7), D07S09, doi:10.1029/2004JD004649, 2005.
