# Supplementary material for: Organic peroxy radical chemistry in oxidation flow reactors and environmental chambers and their atmospheric relevance
Source: Copernicus journal article supplement (doi:10.5194/acp-19-813-2019), 2019-01-22
Supplement: Supplementary file 2 [file acp-19-813-2019-supplement.zip]

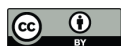

## *Supplement of*

# **Organic peroxy radical chemistry in oxidation flow reactors and environmental chambers and their atmospheric relevance**

**Zhe Peng et al.**

*Correspondence to:* Zhe Peng ([zhe.peng@colorado.edu](mailto:zhe.peng@colorado.edu)) and Jose L. Jimenez ([jose.jimenez@colorado.edu](mailto:jose.jimenez@colorado.edu))

- [acp-19-813-2019-supplement-title-page.pdf](#)
- [General\\_RO2\\_Fate\\_Estimator\\_v1.ipf](#)
- [General\\_RO2\\_Fate\\_Estimator\\_v1.pxt](#)
- [OFR\\_Exposures\\_Estimator\\_v3.3.pxp](#)
- [OFR\\_Exposures\\_Estimator\\_v3.3.pxt](#)
- [Supplement.pdf](#)

The copyright of individual parts of the supplement might differ from the CC BY 4.0 License.
